# Supplementary material
Source: Research Square preprint supplement (doi:10.21203/rs.3.rs-9646588/v1)
Supplement: Supplementary file 1 [file 0906d426106b35a466d063de.docx]

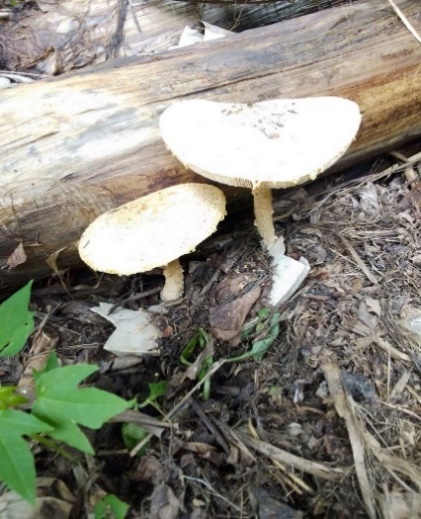
z
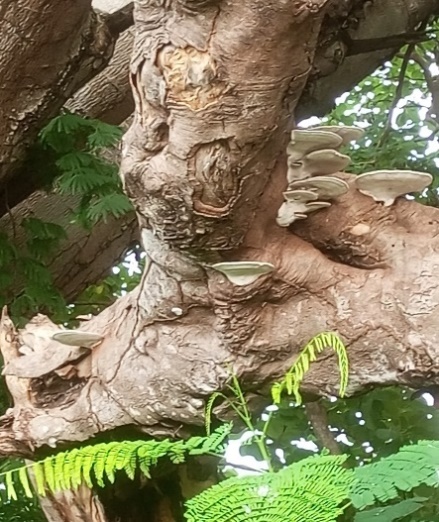

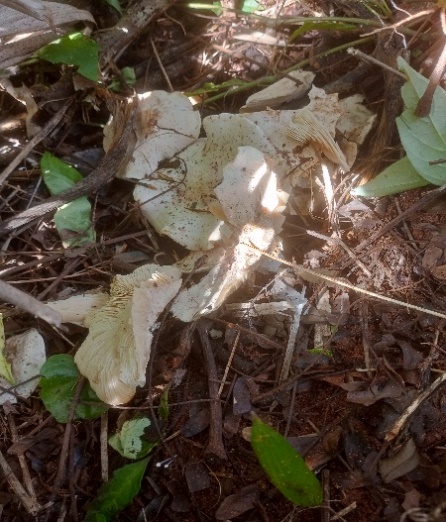


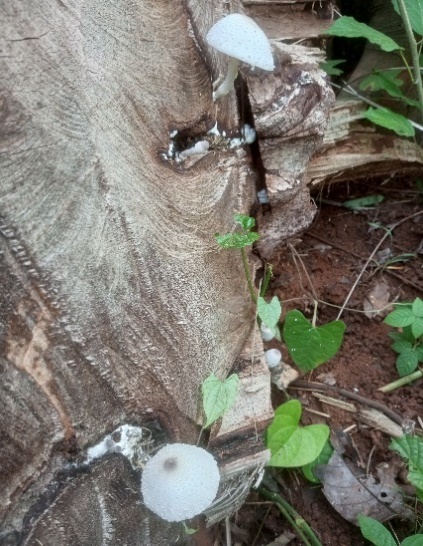

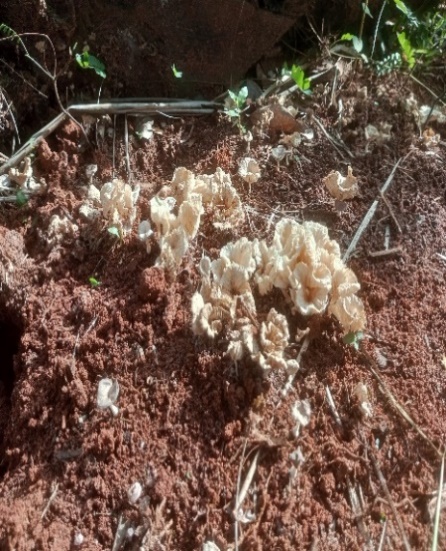

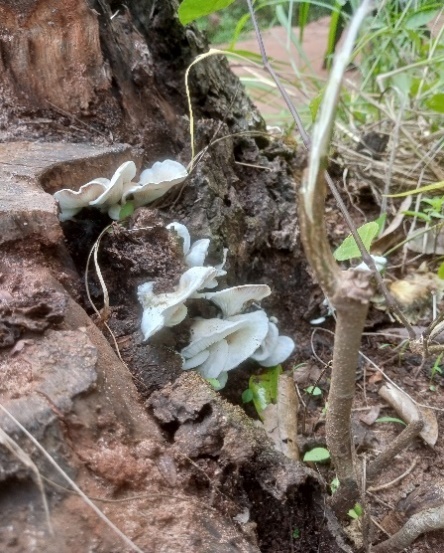


S4

S5

S6


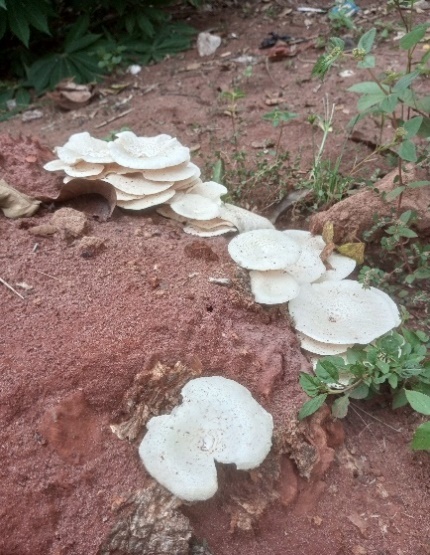

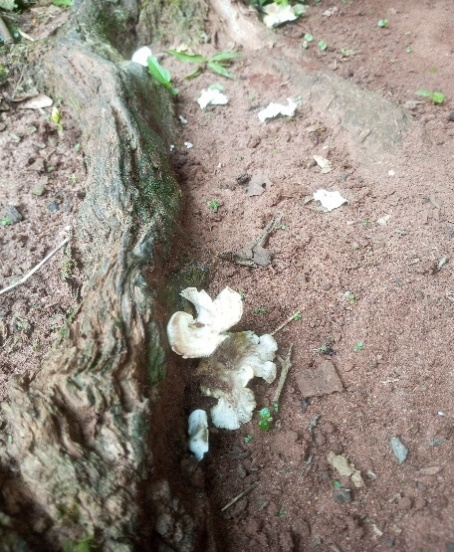

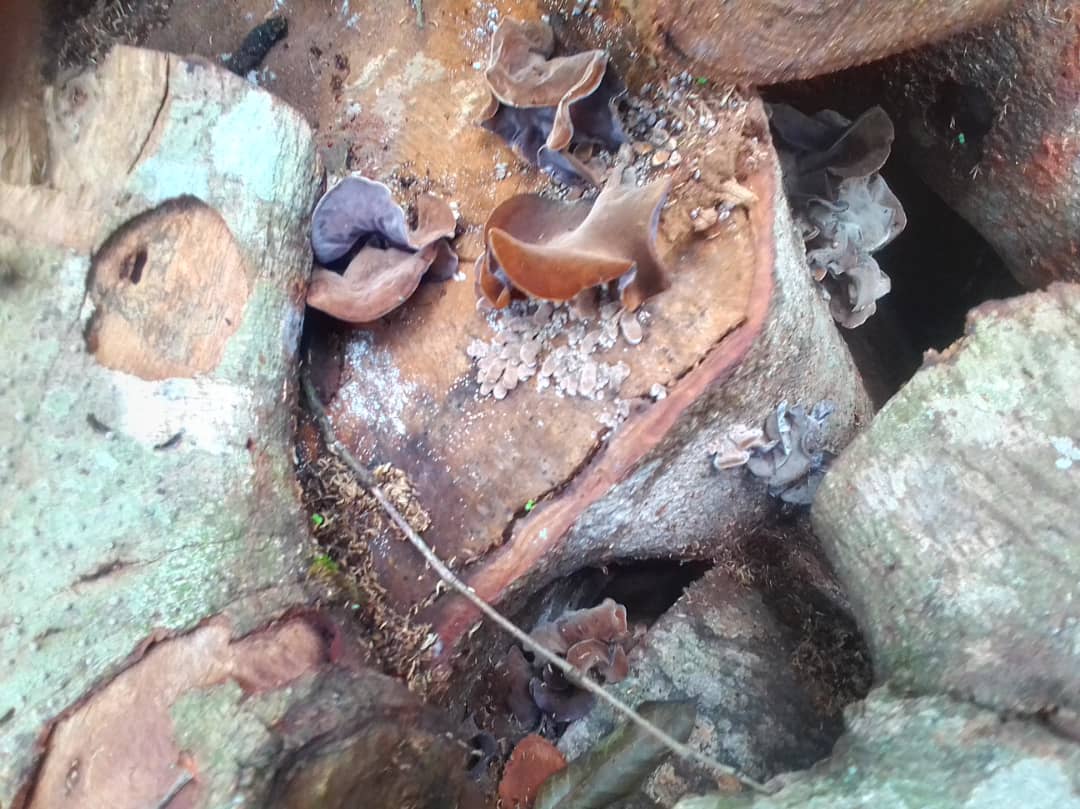


S9

S8

S7

**Plate 2A: Mushroom samples in their natural habitats, S1 – S9.**


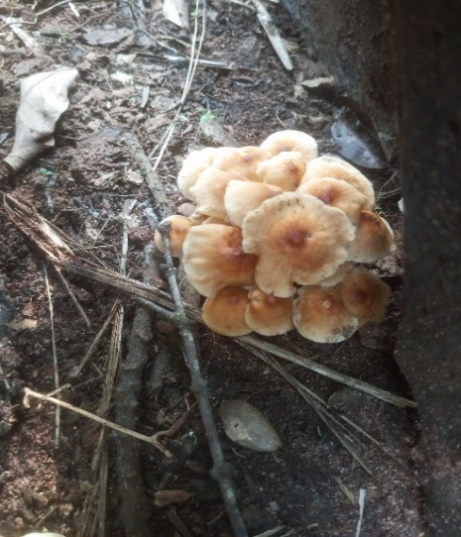

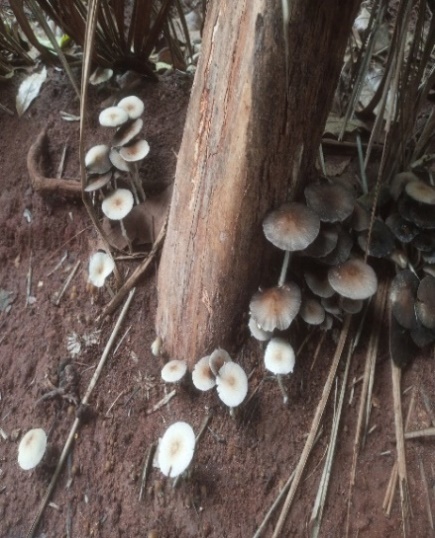

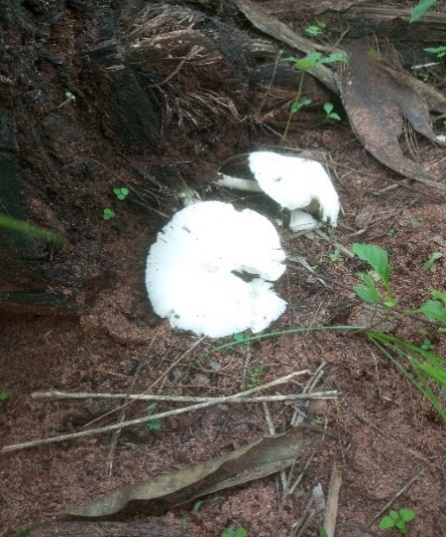


S12

S11

S10


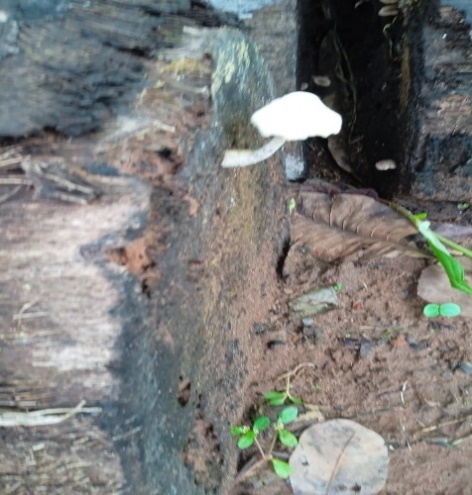

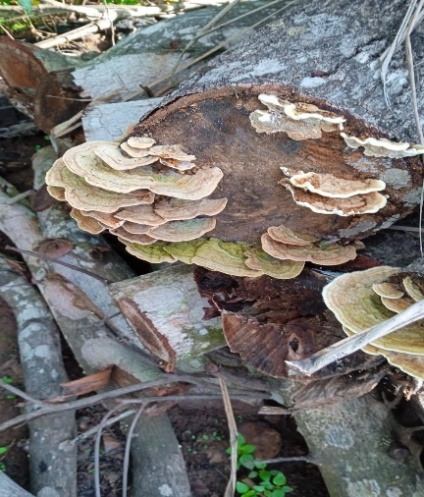

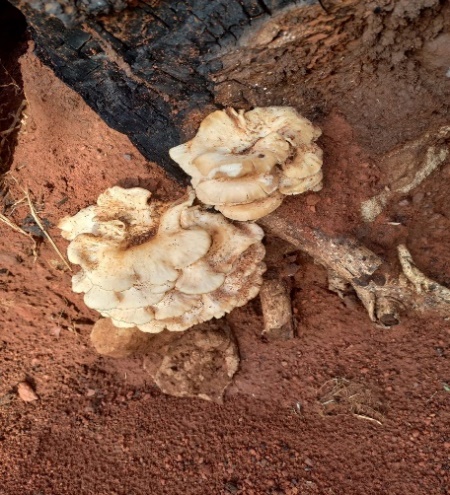


S15

S14

S13


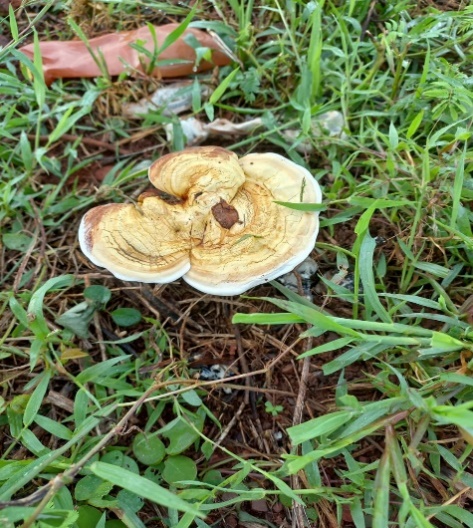

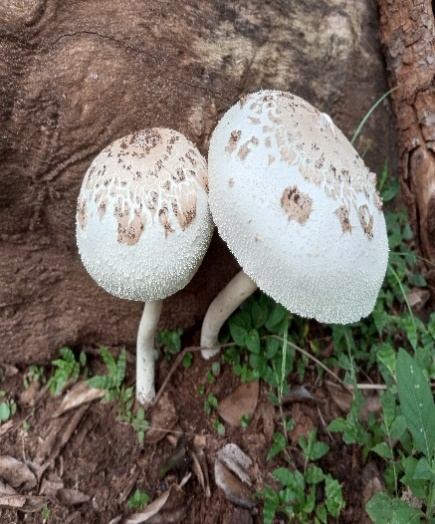

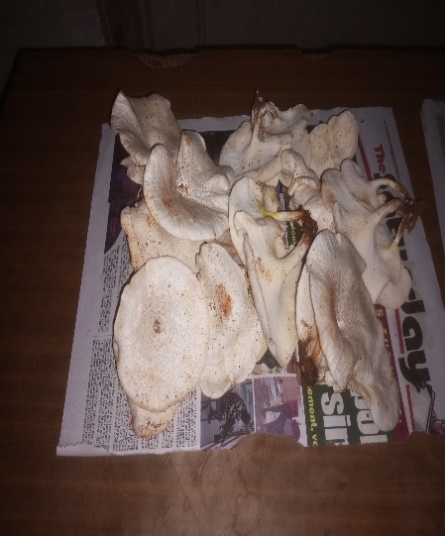


S18

S17

S16

**Plate 2B: Mushroom samples in their natural habitats, S10 – S18.**


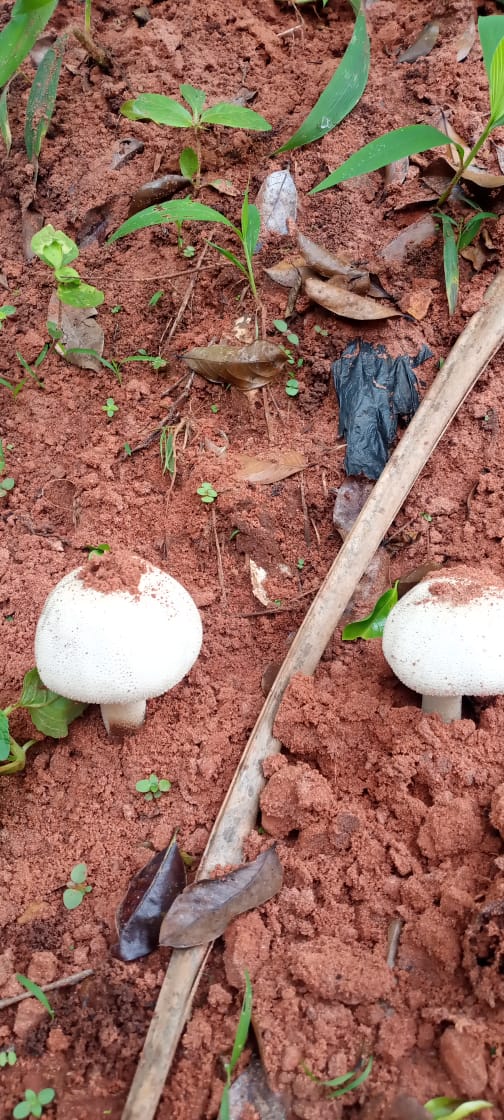

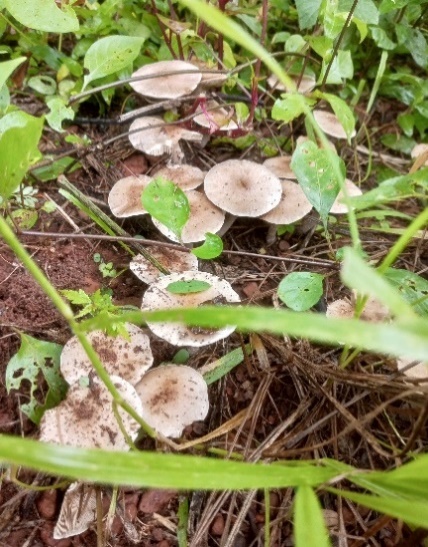

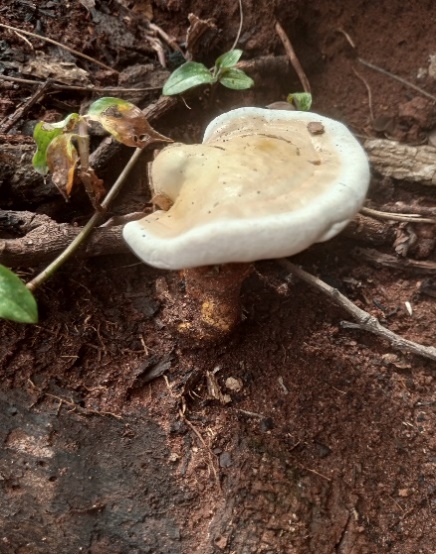


S21

S20

S19


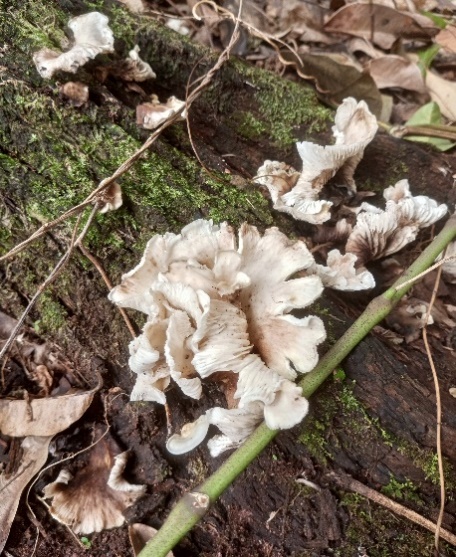

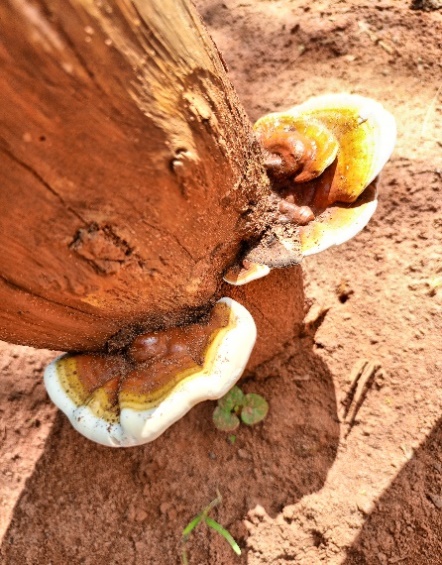

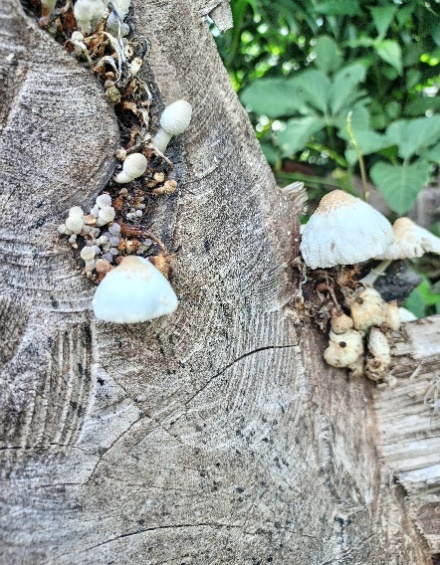


S25

S24

S22


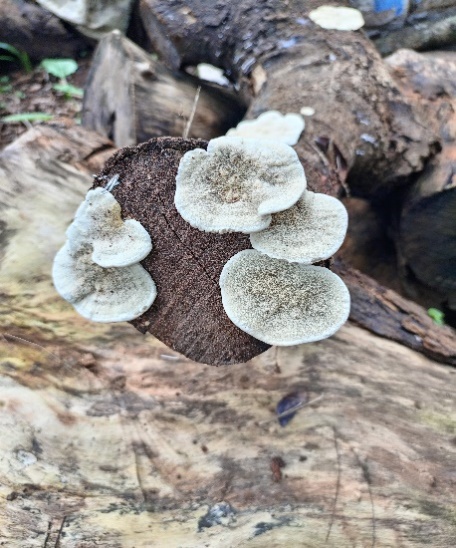

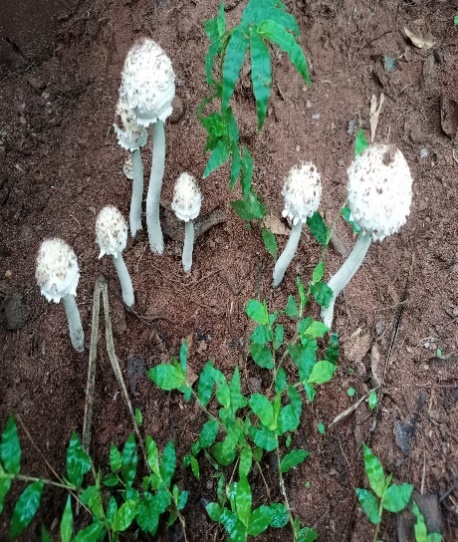

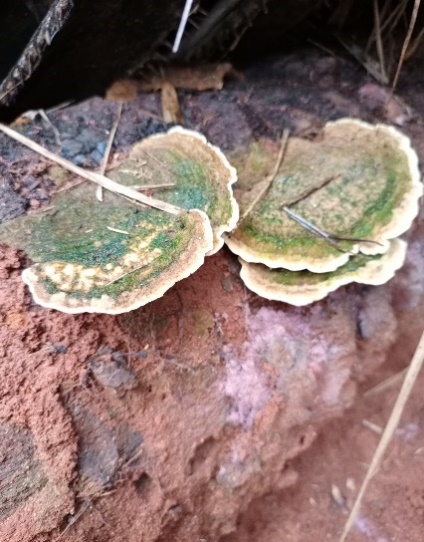


S28

S27

S26

**Plate 2C: Mushroom samples in their natural habitats, S19 – S28.**


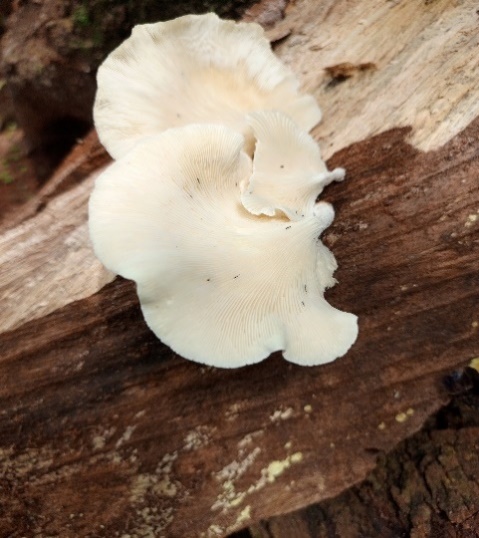

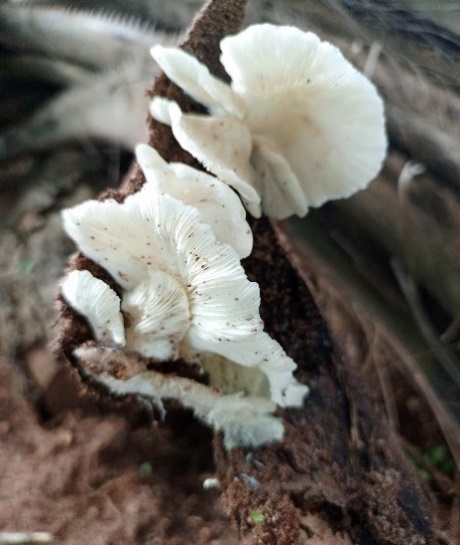

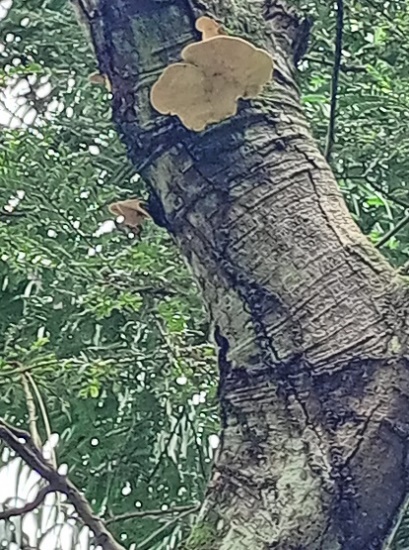


S31

S30

S29


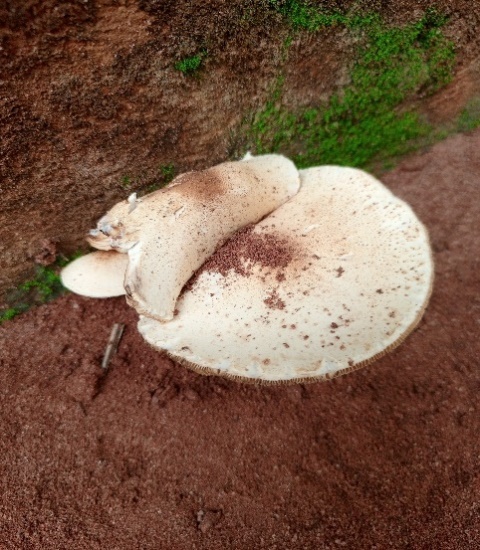

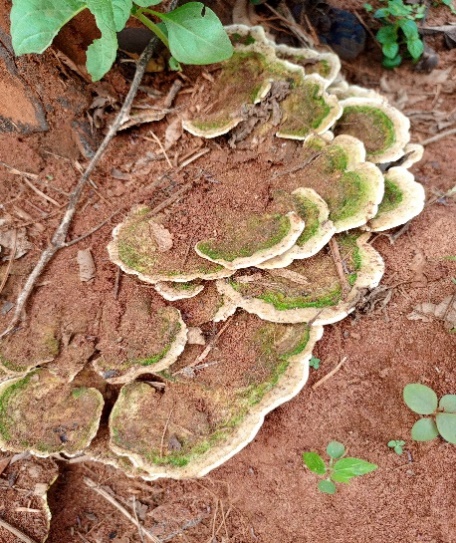

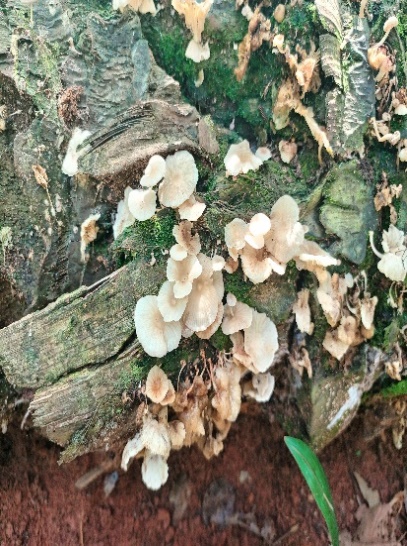


S34

S33

S32


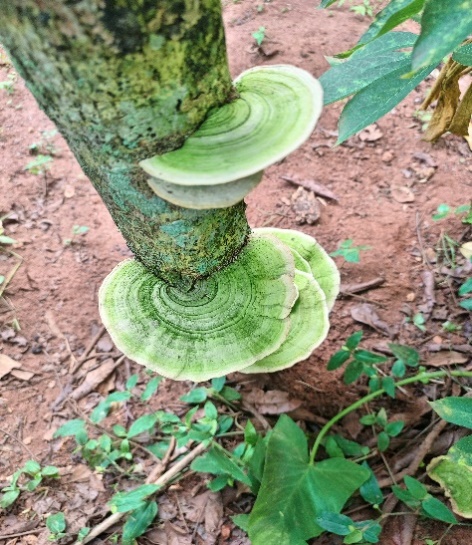

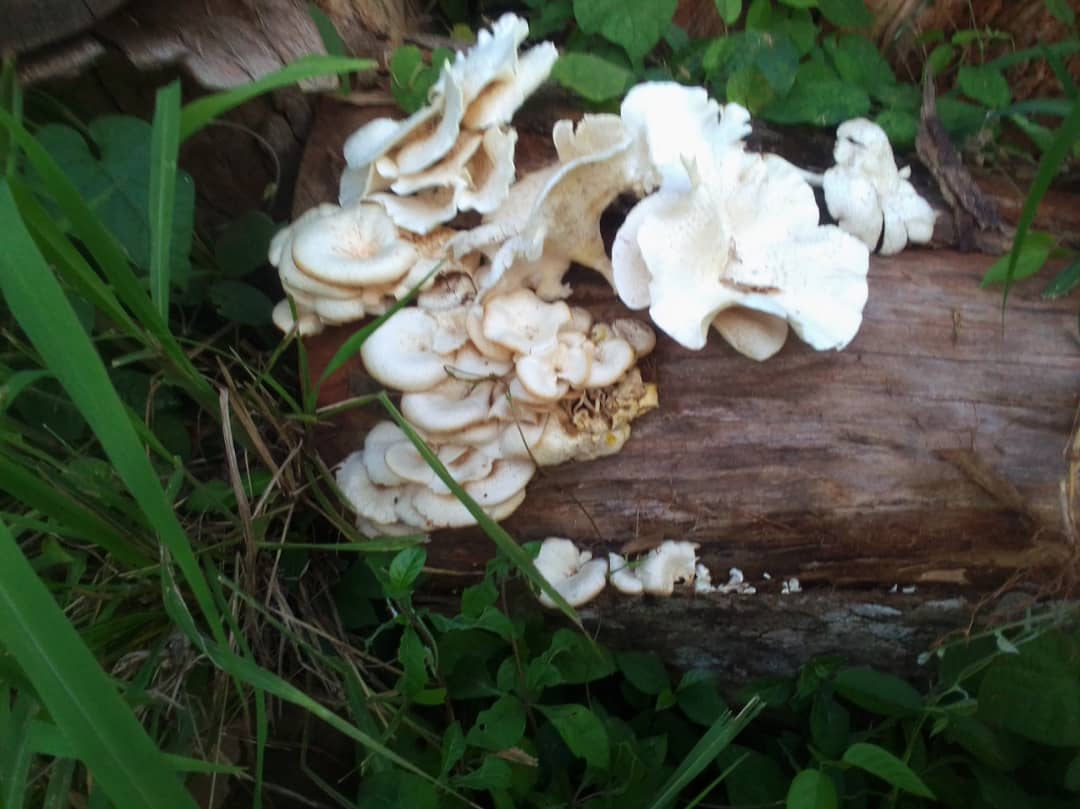

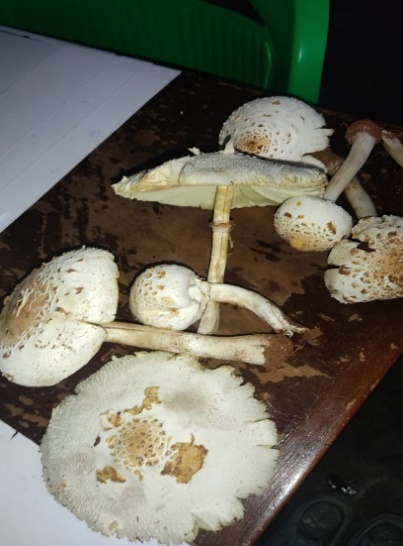


S37

S36

S35

**Plate 2D: Mushroom samples in their natural habitats, S29 – S37.**


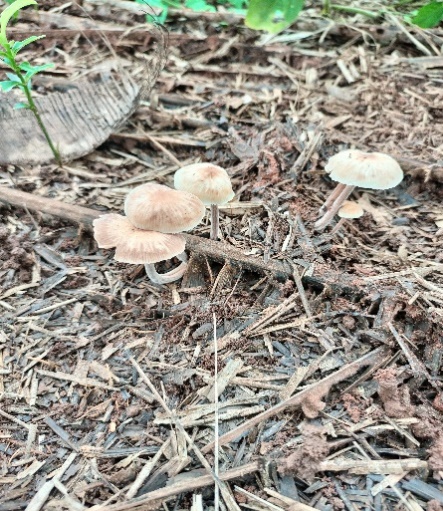

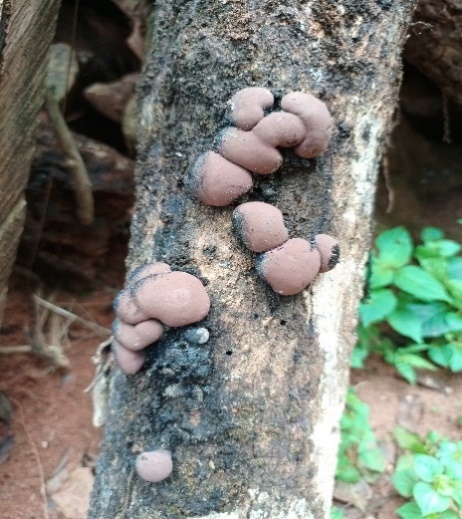

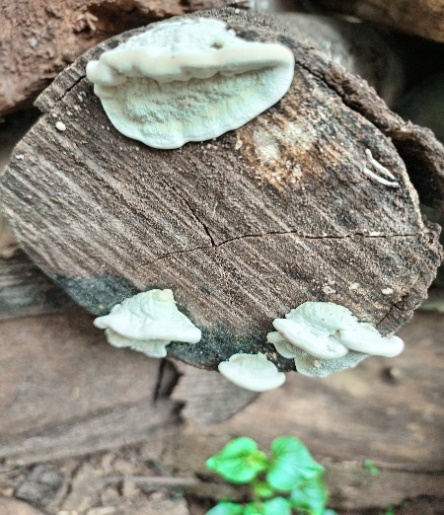


S6

S39

S38


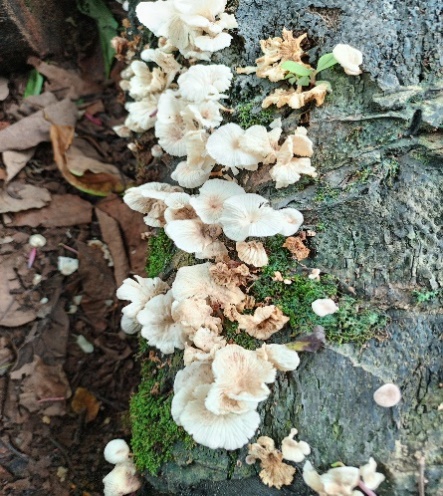

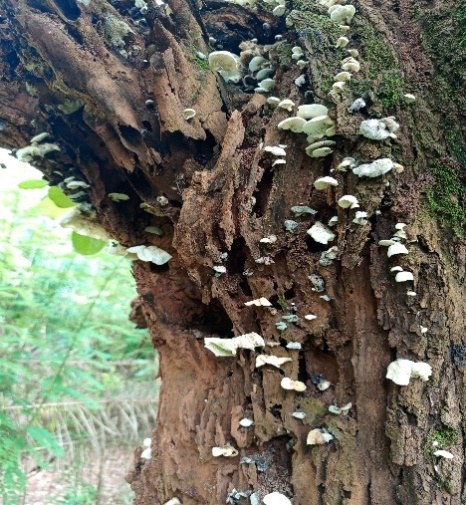

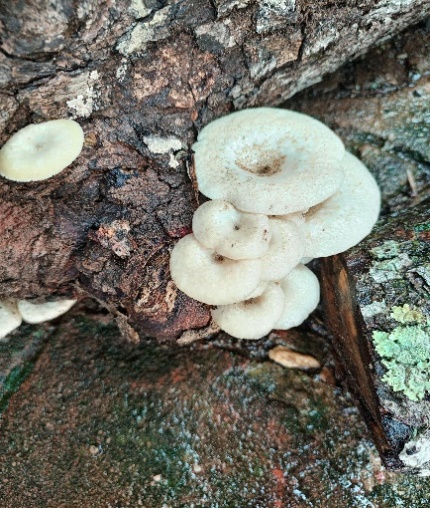


S43

S42

S41

S40


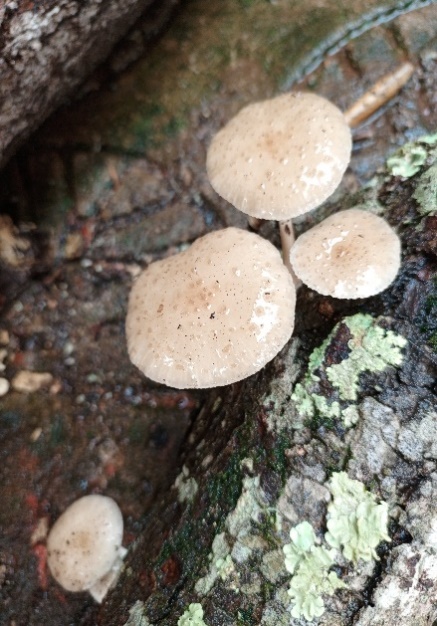

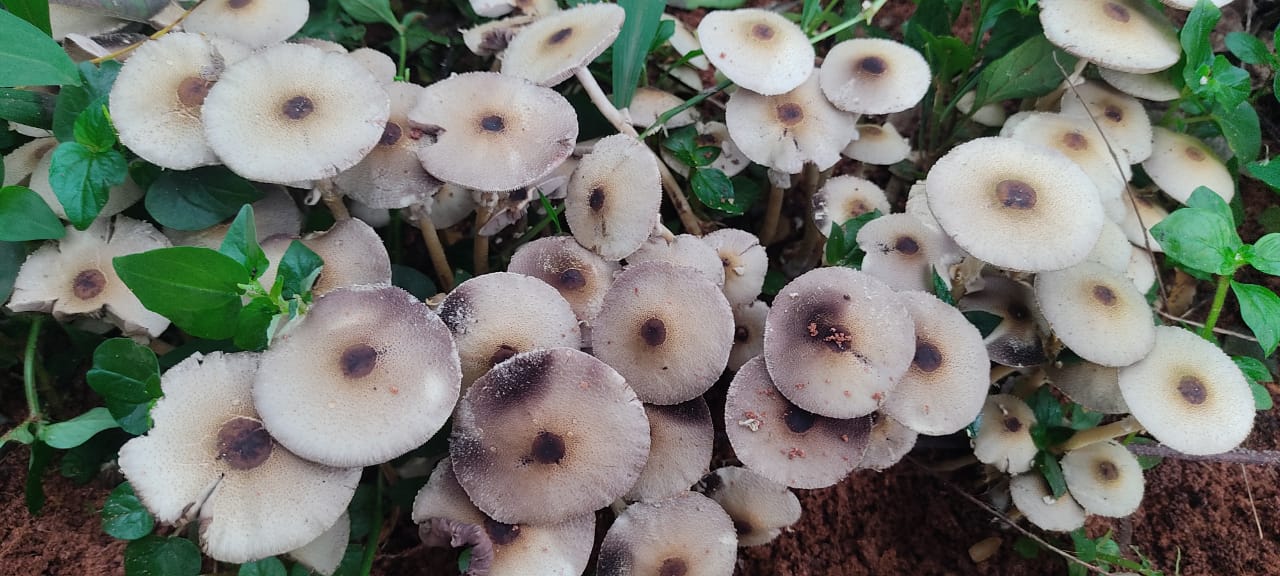

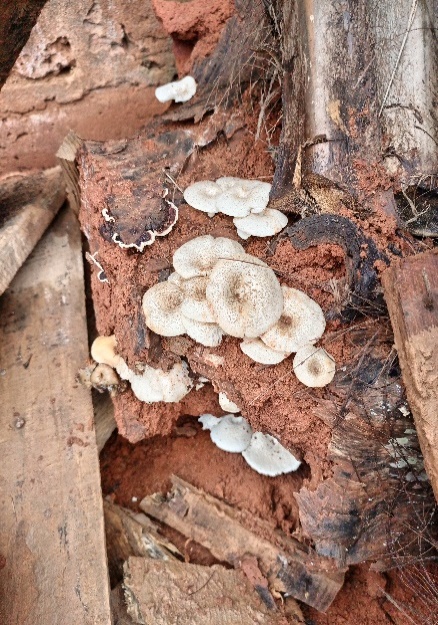


S46

S45

S44

**Plate 2E: Mushroom samples in their natural habitats, S38 – S46.**


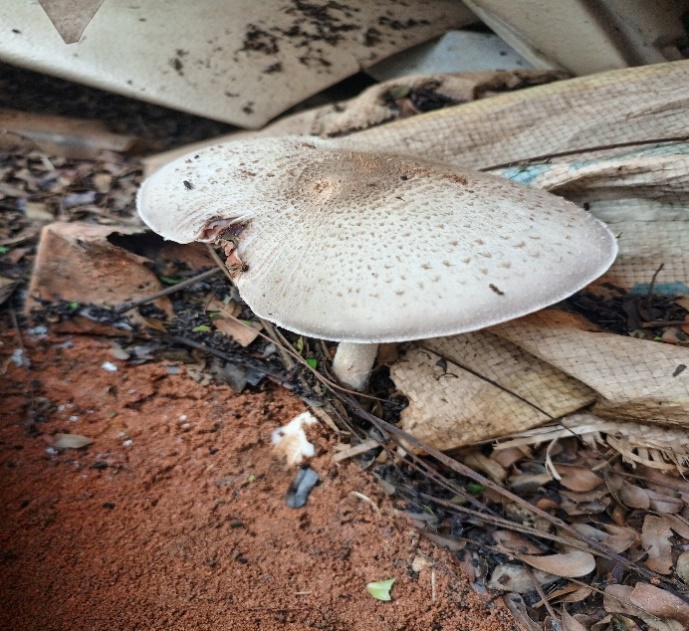

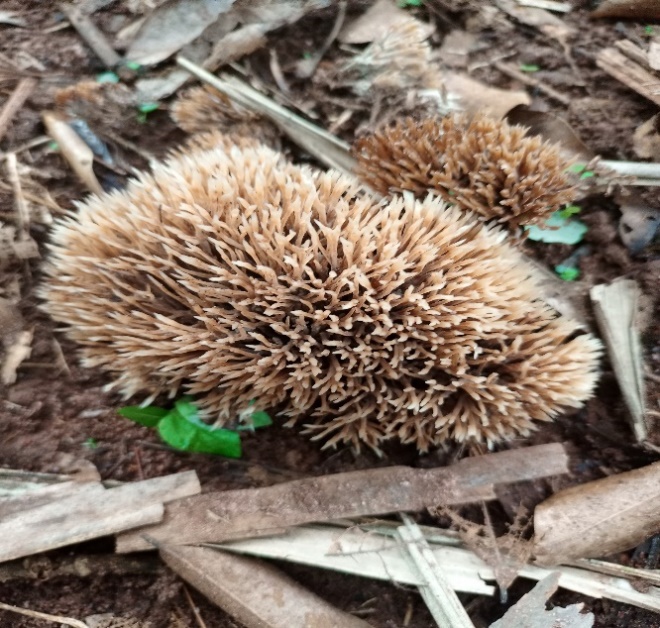


S48

S47


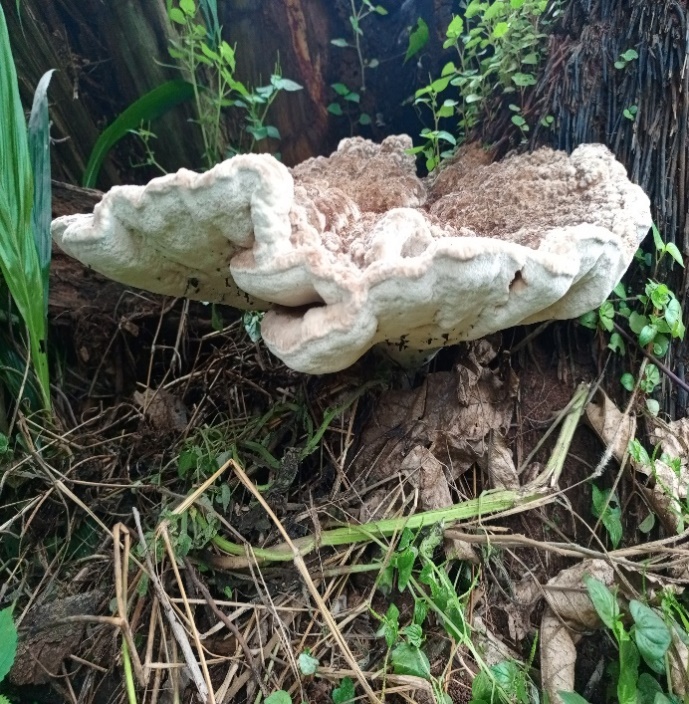

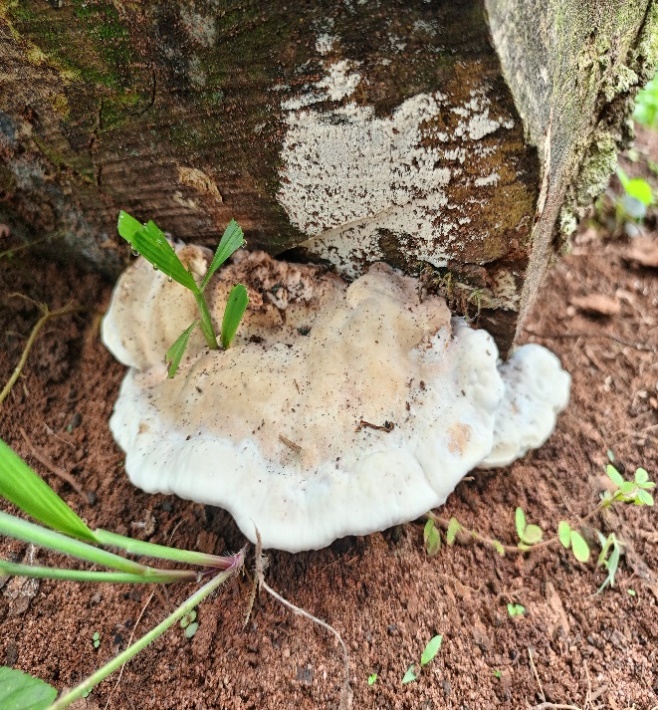


S50

S49

**Plate 2F: Mushroom samples in their natural habitats, S47 – S50.**
